# Supplementary material for: Changes to Material Phase and Morphology Due to High-Level Molybdenum Doping of ZnO Nanorods: Influence on Luminescence and Defects
Source: Materials (Basel). 2023 Apr 22;16(9):3294. doi: 10.3390/ma16093294 (PMC10178970; doi:10.3390/ma16093294)
Supplement: Supplementary file 1 [file materials-16-03294-s001.zip › materials-2305583-supplementary.pdf]

Supporting Information of the paper: **“Changes caused to material phase and morphology due to high-level molybdenum doping of ZnO nanorods: Influence on luminescence and defects”**

Maksym Buryi<sup>1</sup>, Vladimir Babin<sup>1\*</sup>, Neda Neykova<sup>1,2</sup>, Yu-Min Wang<sup>3</sup>, Zdeněk Remeš<sup>1</sup>, Katarína Ridzoňová<sup>1,4</sup>, Filip Dominec<sup>1</sup>, Marina Davydova<sup>1</sup>, Jan Drahokoupil<sup>1</sup>, Sergii Chertopalov<sup>1</sup>, Lucie Landová<sup>1,2</sup>, Ognen Pop-Georgievski<sup>3</sup>

<sup>1</sup>FZU - Institute of Physics of the Czech Academy of Sciences, Na Slovance 1999/2, 182 21, Prague, Czechia

<sup>2</sup>Czech Technical University in Prague, Faculty of Electrical Engineering, Technická 2, 166 27 Prague, Czechia

<sup>3</sup>Department of Chemistry and Physics of Surfaces and Interfaces, Institute of Macromolecular Chemistry, Czech Academy of Sciences, Heyrovský sq. 2, 16206 Prague, Czechia

<sup>4</sup>Charles University, Faculty of Mathematics and Physics, Institute of Physics, Ke Karlovu 5, 121 16, Prague 2, Czechia

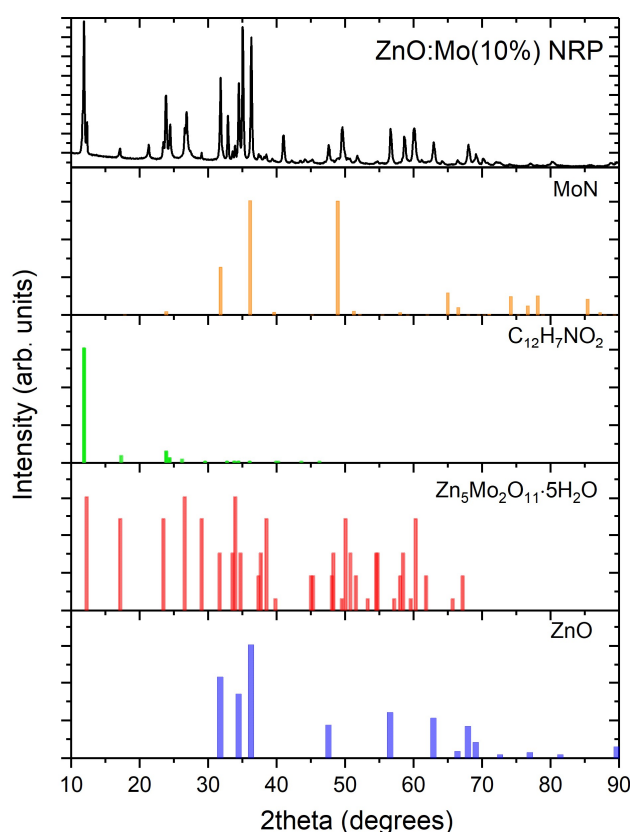

Figure S1 The XRD pattern of ZnO:Mo(10%) NRP shown along with the XRD patterns of ZnO, Zn<sub>5</sub>Mo<sub>2</sub>O<sub>11</sub>·5H<sub>2</sub>O, C<sub>12</sub>H<sub>7</sub>NO<sub>2</sub> and MoN PDF data (for details see main article).

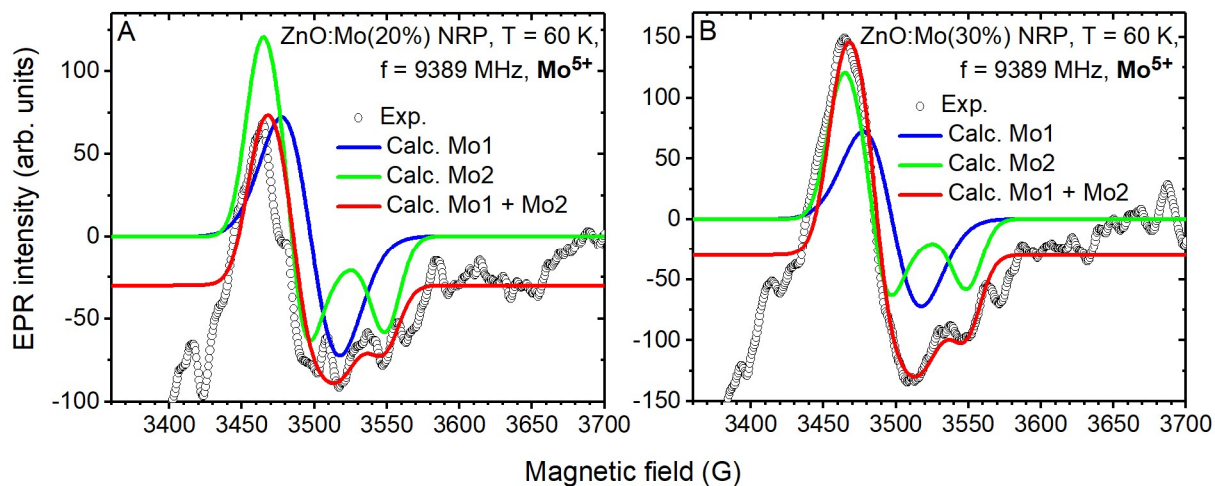

Figure S2  $\text{Mo}^{5+}$  experimental EPR spectra measured at 60 K in the as grown ZnO:Mo(20%) (A) and ZnO:Mo(30%) (B) NRP samples shown along with the calculated signals. Mo3,4 indicate contributions from two different  $\text{Mo}^{5+}$  centers.

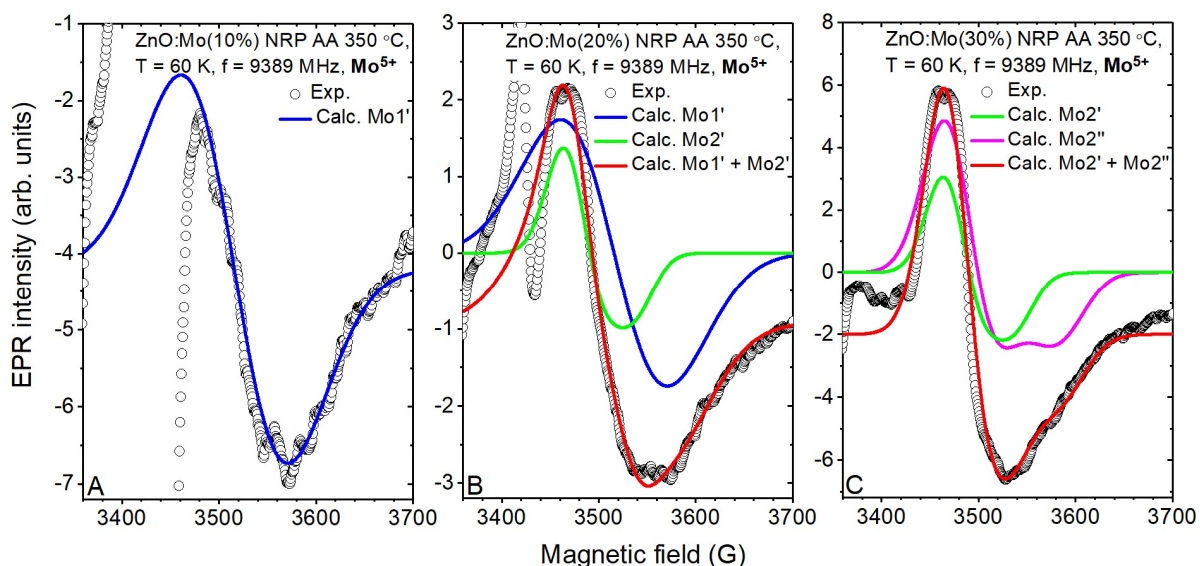

Figure S3  $\text{Mo}^{5+}$  experimental EPR spectra measured at 60 K after the annealing in air at 350 °C in the ZnO:Mo(10%) (A), ZnO:Mo(20%) (B) and ZnO:Mo(30%) (C) NRP samples shown along with the calculated signals. Mo1',2',2'' indicate contributions from two different  $\text{Mo}^{5+}$  centers.
